# Supplementary material for: Probing the Structural Determinants of Amino Acid Recognition: X-Ray Studies of Crystalline Ditopic Host-Guest Complexes of the Positively Charged Amino Acids, Arg, Lys, and His with a Cavitand Molecule
Source: PubMed Central journal article supplement (PMC6321202; doi:10.3390/molecules23123368), 2018-12-19
Supplement: molecules-23-03368-s001.pdf [file molecules-23-03368-s001.pdf]

1

2

## SUPPLEMENTARY MATERIAL

3

4 **Probing the structural determinants of amino acid**  
5 **recognition: X-ray studies of crystalline ditopic host-**  
6 **guest complexes of the positively charged amino**  
7 **acids, Arg, Lys and His with a cavitand molecule.**

8 **Giovanna Brancatelli<sup>1</sup>, Enrico Dalcanale<sup>2</sup>, Roberta Pinalli<sup>2,\*</sup> and Silvano Geremia<sup>1,\*</sup>**

9

10

11

12

13

**Table S1.** Experimental details for the co-crystallization experiments of the host-guest complexes of cavitand Tiiii[H, CH<sub>3</sub>, CH<sub>3</sub>] with the selected amino acids.

| Amino acid | Amino acid Concentration in HCl 1 M(mM) | Molar Ratio cavitand:amino acid | Composition of Reservoir (v/v) |
|------------|-----------------------------------------|---------------------------------|--------------------------------|
| Arg        | 300                                     | 1:5                             | PEG 300 25-50%                 |
| Lys        | 30                                      | 2:1                             | PEG 300 5-15%                  |
| His        | 300                                     | 1:5                             | PEG 300 25-50%                 |

14

15

**Table S2.** Crystal data and structure refinement details for the host-guest complexes

|                                             | Arg 2HCl                                                                                                                                                                                                               | Lys 2HCl                                                                                                                                                                                                               | His 2HCl                                                                                                                                                                                                               |
|---------------------------------------------|------------------------------------------------------------------------------------------------------------------------------------------------------------------------------------------------------------------------|------------------------------------------------------------------------------------------------------------------------------------------------------------------------------------------------------------------------|------------------------------------------------------------------------------------------------------------------------------------------------------------------------------------------------------------------------|
| Empirical formula                           | 2(C <sub>36</sub> H <sub>36</sub> O <sub>12</sub> P <sub>4</sub> ),<br>C <sub>6</sub> H <sub>16</sub> N <sub>4</sub> O <sub>2</sub> , 2Cl,<br>4.4(C <sub>2</sub> H <sub>3</sub> F <sub>3</sub> O), 3.7H <sub>2</sub> O | 2(C <sub>36</sub> H <sub>36</sub> O <sub>12</sub> P <sub>4</sub> ),<br>C <sub>6</sub> H <sub>16</sub> N <sub>2</sub> O <sub>2</sub> , 2Cl,<br>6.1(C <sub>2</sub> H <sub>3</sub> F <sub>3</sub> O), 2.8H <sub>2</sub> O | 4(C <sub>36</sub> H <sub>36</sub> O <sub>12</sub> P <sub>4</sub> ),<br>2(C <sub>6</sub> H <sub>11</sub> N <sub>3</sub> O <sub>2</sub> ), 4Cl<br>10(C <sub>2</sub> H <sub>3</sub> F <sub>3</sub> O), 4 H <sub>2</sub> O |
| Formula weight                              | 2253.06                                                                                                                                                                                                                | 2158.80                                                                                                                                                                                                                | 4546.81                                                                                                                                                                                                                |
| T (K)                                       | 100(2)                                                                                                                                                                                                                 | 100(2)                                                                                                                                                                                                                 | 100(2)                                                                                                                                                                                                                 |
| λ (Å)                                       | 0.700                                                                                                                                                                                                                  | 0.700                                                                                                                                                                                                                  | 0.700                                                                                                                                                                                                                  |
| Crystal system                              | Monoclinic                                                                                                                                                                                                             | Orthorhombic                                                                                                                                                                                                           | Monoclinic                                                                                                                                                                                                             |
| Space group                                 | <i>P</i> 2 <sub>1</sub>                                                                                                                                                                                                | <i>P</i> 2 <sub>1</sub> 2 <sub>1</sub> 2                                                                                                                                                                               | <i>P</i> 2 <sub>1</sub>                                                                                                                                                                                                |
| Unit cell dimensions (Å, °)                 | a = 12.443(1)<br>b = 26.937(2)<br>c = 17.394(2)<br>β = 108.96(3)                                                                                                                                                       | a = 21.654(4)<br>b = 32.439(7)<br>c = 15.809(3)                                                                                                                                                                        | a = 17.644(2)<br>b = 23.627(2)<br>c = 25.567(3)<br>β = 93.909(4)                                                                                                                                                       |
| V (Å <sup>3</sup> )                         | 5513.8(13)                                                                                                                                                                                                             | 11105(4)                                                                                                                                                                                                               | 10633(2)                                                                                                                                                                                                               |
| Z                                           | 2                                                                                                                                                                                                                      | 4                                                                                                                                                                                                                      | 2                                                                                                                                                                                                                      |
| ρ(calc) (g/mm <sup>3</sup> )                | 1.399                                                                                                                                                                                                                  | 1.464                                                                                                                                                                                                                  | 1.469                                                                                                                                                                                                                  |
| μ (mm <sup>-1</sup> )                       | 0.212                                                                                                                                                                                                                  | 0.207                                                                                                                                                                                                                  | 0.263                                                                                                                                                                                                                  |
| F(000)                                      | 2406                                                                                                                                                                                                                   | 5060                                                                                                                                                                                                                   | 4816                                                                                                                                                                                                                   |
| Reflections collected                       | 18443                                                                                                                                                                                                                  | 44450                                                                                                                                                                                                                  | 28901                                                                                                                                                                                                                  |
| Independent reflections                     | 18443                                                                                                                                                                                                                  | 17357                                                                                                                                                                                                                  | 28901                                                                                                                                                                                                                  |
| Data / restraints / parameters              | 18443/3/1288                                                                                                                                                                                                           | 17357/18/1128                                                                                                                                                                                                          | 28901/1753/2674                                                                                                                                                                                                        |
| GooF                                        | 1.066                                                                                                                                                                                                                  | 1.008                                                                                                                                                                                                                  | 1.006                                                                                                                                                                                                                  |
| R <sub>1</sub> , wR <sub>2</sub> [I>2σ(I)]  | 0.0749, 0.2095                                                                                                                                                                                                         | 0.0684, 0.1882                                                                                                                                                                                                         | 0.0682, 0.1548                                                                                                                                                                                                         |
| R <sub>1</sub> , wR <sub>2</sub> (all data) | 0.0763, 0.2113                                                                                                                                                                                                         | 0.1014, 0.2112                                                                                                                                                                                                         | 0.1219, 0.1868                                                                                                                                                                                                         |
| Absolute structure parameter                | 0.10(2)                                                                                                                                                                                                                | 0.09(6)                                                                                                                                                                                                                | -0.03(8)                                                                                                                                                                                                               |
| CCDC code number                            | 1869187                                                                                                                                                                                                                | 1876524                                                                                                                                                                                                                | 1869186                                                                                                                                                                                                                |

16

17
